# Supplementary material for: In-depth proteomic profiling of the uveal melanoma secretome
Source: PubMed Central journal article supplement (PMC5226534; doi:10.18632/oncotarget.10418), 2016-07-06
Supplement: oncotarget-07-49623-s001.pdf [file oncotarget-07-49623-s001.pdf]

# In-depth proteomic profiling of the uveal melanoma secretome

## Supplementary Materials

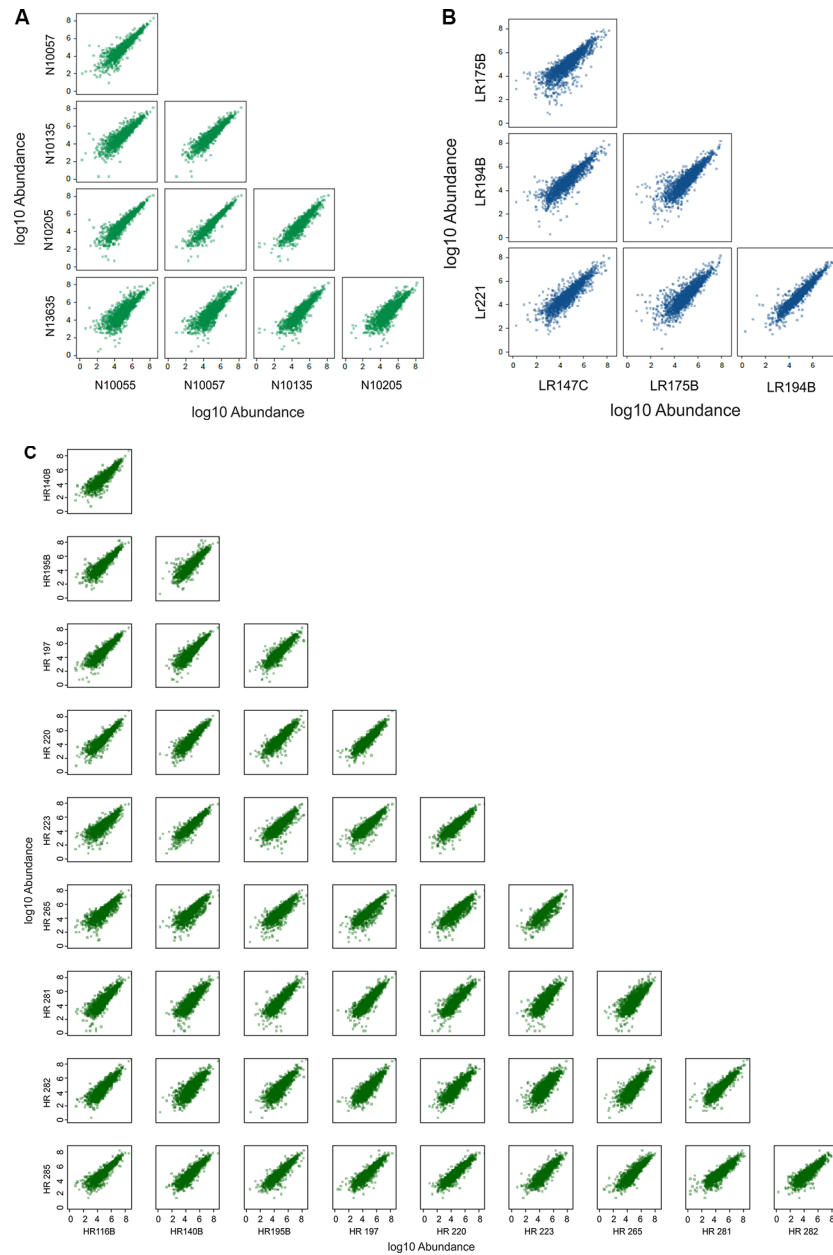

**Supplementary Figure S1: Replicability of proteome analyses.** For replicate secretome samples, the label-free quantitative profile of each sample was compared to the other samples from the same group and plotted as log transformed scatterplots. Data from NCM, LR-UM and HR-UM are shown in (A), (B) and (C) respectively.

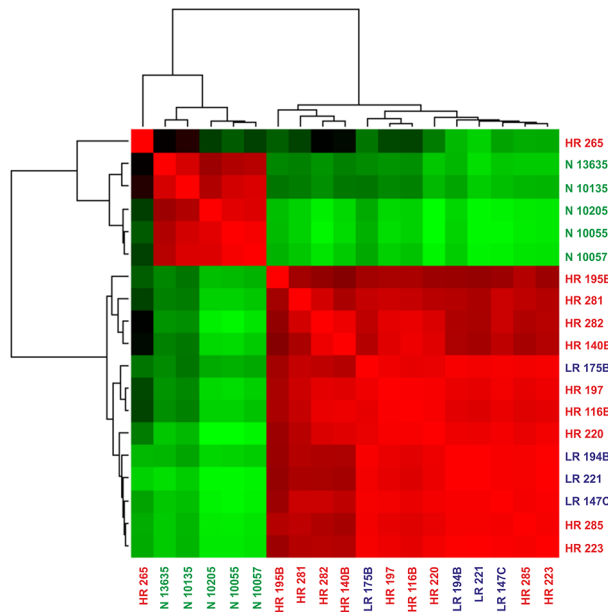

**Supplementary Figure S2: Correlation heatmap of replicability of proteome analyses.** For each set of secretome replicates, the Pearson correlation coefficient was high, and this was true also between LR and HR UM subsets. Between sample groups, however, the correlation coefficients were lower.

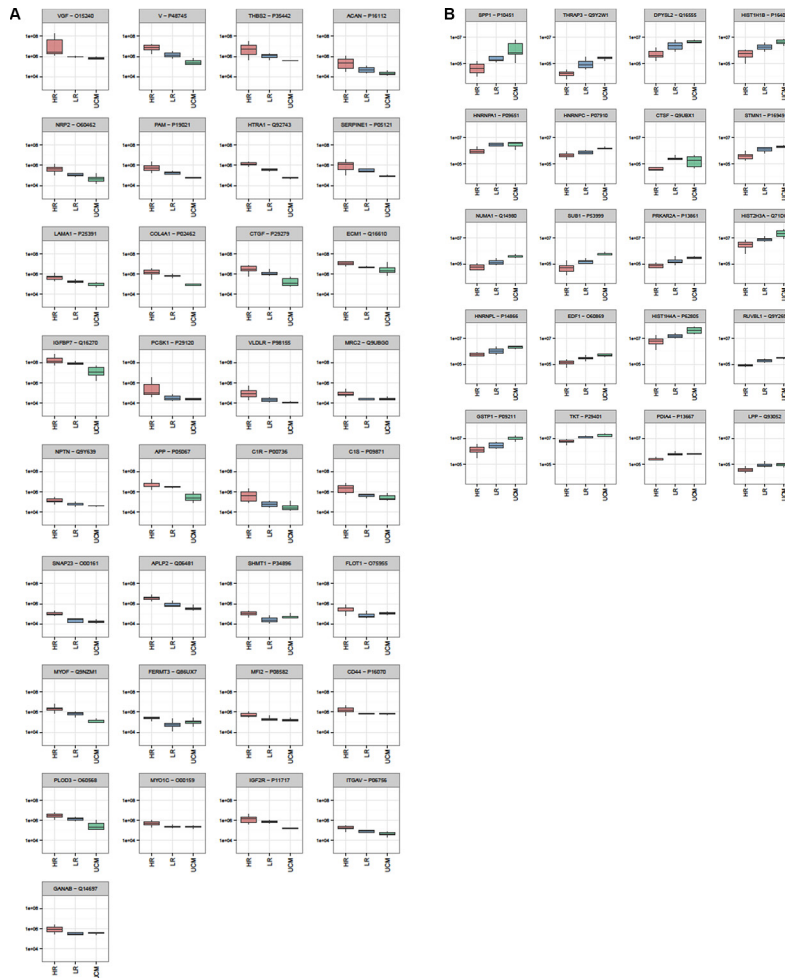

**Supplementary Figure S3: Subset of proteins differentially expressed in HR-UM only compared with both LR-UM and NCM.** Box and whisker plots of the 33 proteins up-regulated (A) or the 20 proteins that are down-regulated (B), between HR-UM and LR-UM/NCMs (see main manuscript for discussion).

**Supplementary Table S1: Clinical, histopathological and genetic characteristics of the patient tumours used for secretome production**

| Sample No. | Age of patient at diagnosis (years) | Sex | LBD (mm) | UH (mm) | CBI | EOE | Cell type | Loops | Mitotic count/40 HPF | Chr3 status | Mets risk       |
|------------|-------------------------------------|-----|----------|---------|-----|-----|-----------|-------|----------------------|-------------|-----------------|
| S116-12    | 59                                  | F   | 15.7     | 5.2     | N   | N   | SPIN      | Y     | 7                    | L           | HR <sup>y</sup> |
| S140-12    | 58                                  | M   | 17.6     | 11      | N   | Y   | MIX       | N     | 5                    | L           | HR*             |
| S147-12    | 61                                  | M   | 16.3     | 8.6     | N   | N   | MIX       | Y     | 5                    | N           | LR*             |
| S175-12    | 64                                  | F   | 17.4     | 6.5     | N   | N   | SPIN      | N     | 3                    | N           | LR              |
| S194-12    | 41                                  | M   | 12.7     | 11.6    | N   | N   | MIX       | N     | 3                    | N           | LR              |
| S195-12    | 77                                  | F   | 14.7     | 5.7     | N   | N   | EPI       | N     | 7                    | L           | HR*             |
| S197-12    | 71                                  | F   | 13.6     | 8       | N   | N   | MIX       | Y     | 6                    | L           | HR              |
| S220-12    | 80                                  | F   | 18.2     | 12.5    | N   | Y   | MIX       | N     | 1                    | L           | HR              |
| S221-12    | 51                                  | M   | 16.2     | 14.8    | Y   | N   | SPIN      | Y     | 4                    | N           | LR              |
| S223-12    | 67                                  | M   | 18.7     | 12.2    | Y   | N   | MIX       | N     | 2                    | L           | HR*             |
| S265-12    | 76                                  | F   | 15.4     | 7.8     | N   | N   | SPIN      | N     | 7                    | L           | HR              |
| S281-12    | 71                                  | M   | 13       | 5.9     | N   | Y   | MIX       | N     | 4                    | L           | HR*             |
| S282-12    | 65                                  | M   | 19.2     | 16.8    | Y   | N   | MIX       | Y     | 1                    | L           | HR              |
| S285-12    | 77                                  | F   | 15.2     | 8.9     | N   | N   | MIX       | N     | 4                    | L           | HR              |

*LBD: largest basal diameter; UH: tumour thickness; F: Female; M: Male; CBI: ciliary body involvement; EOE: extraocular extension; cell type: spindle, mixed, epithelioid; HPF: high power field; HR: high risk; LR: low risk; Chromosome 3 status: N-normal, L-loss, G-gain; \*indicates death from metastatic disease; <sup>y</sup> indicates death from other causes.*

**Supplementary Table S2: Clinical features of the donor eyes used for culture of NCM**

| Sample No. | Age | Sex | Cause of death         | Other history                                          |
|------------|-----|-----|------------------------|--------------------------------------------------------|
| NCM1       | 63  | F   | Renal cancer           | Thyroid disease, hypercholesterolemia, atherosclerosis |
| NCM2       | 39  | M   | Cardiac arrest         | Nil                                                    |
| NCM3       | 52  | M   | Pancreatic cancer      | Non-insulin dependent diabetes                         |
| NCM4       | 55  | M   | Cardiac arrest         | Nil                                                    |
| NCM5       | 17  | M   | Motor vehicle accident | Nil                                                    |

*F: female; M: male.*

**Supplementary Table S3: Activated biological functions in UM cells as compared with NCM.** See Supplementary File 1

**Supplementary Table S4: Canonical signalling pathways associated with UM.** See Supplementary File 2

**Supplementary Table S5: 325 differentially expressed secreted proteins.** See Supplementary File 3
